# Supplementary material for: Detection of Multi-Modal Doppler Spectra. Part 1: Establishing Characteristic Signals in Radar Moment Data
Source: Copernicus journal article supplement (doi:10.5194/egusphere-2025-671), 2025-02-25
Supplement: Supplementary file [file egusphere-2025-671-AC1-supplement.pdf]

Reviewer #1:

### Major Comments:

Major Comment 1: The authors should come up with a better way of quantifying multi-modal spectra. The authors could easily develop quantitative metrics for degree of multi-modality using a variety of techniques such as fitting the spectra at each height with a Gaussian Mixture model and by using the Gaussian mixture components to derive relevant statistical measures of multi-modality. My concern is that the authors are being a bit too selective about what they consider to be multi-modal and unimodal. An objective metric that is more independent of researcher biases here would be more informative and would provide a fairer representation of multi-modal/unimodality inherent in the spectra data.

Thanks for this feedback. This also came up as a similar suggestion from Reviewer 2 to consider a peak detection toolset similar to the Gaussian Mixture model (abbreviated GMM going forward). Ultimately, we have followed your recommendation and now utilize a Bayesian Gaussian Mixture model to first detect the number of peaks at every height in the original three cases at the nine specified times. This is done to temporally averaged spectra over approximately 12 seconds (with the varied temporal resolution of KAZR and KASPR, this is more precisely 11.08 s (3 time steps) for both cases using KAZR and 12.39 s (12 time steps) for KASPR). This averaging reduces the superfluous peaks detected by the automatic peak detection function and noise generated by rapidly switching between 2, 3, or greater peaks when observed the detected peak count with respect to height.

We now use the results of this to inform layer selection of “control” and “mode” layers, and those previously selected layers are adjusted in the revision to confirm their uni-modal or multi-modal status before assigning them to either a control or mode category. Taking the SBRO case for example, the previous analysis was indeed missing a subtle multi-modal layer that overlaps with the previous “control” layer for that case. While this lower multi-modal layer is much less distinct, it is detectable through spectral analysis. An additional multi-modal layer is added to the analysis and the “control” layer is now represented elsewhere, when a uni-modal layer unaffected by turbulence can be identified. Additionally, the depth of the upper level multi-modal layer is now extended. For the NSA case, the control layers are minorly affected and shortened to accommodate the limited uni-modal depth identified with GMM. For the SGP case, we were missing a low-level multi-modal layer that is now reclassified and the uni-modal control layers were relocated to near the top of the cloud.

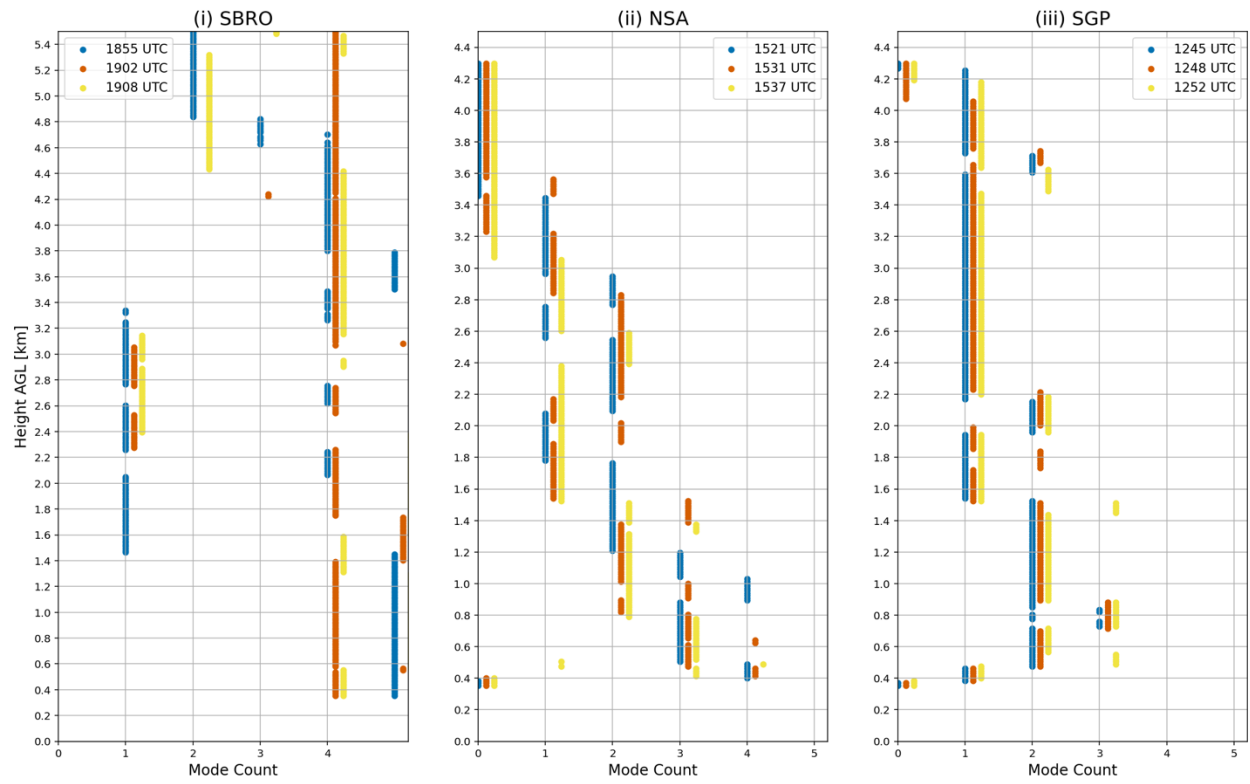

Fig. R1: Bayesian GMM fit mode count for the foundational cases. Plotted is the average mode count over a 300-m window in height to reduce noise.

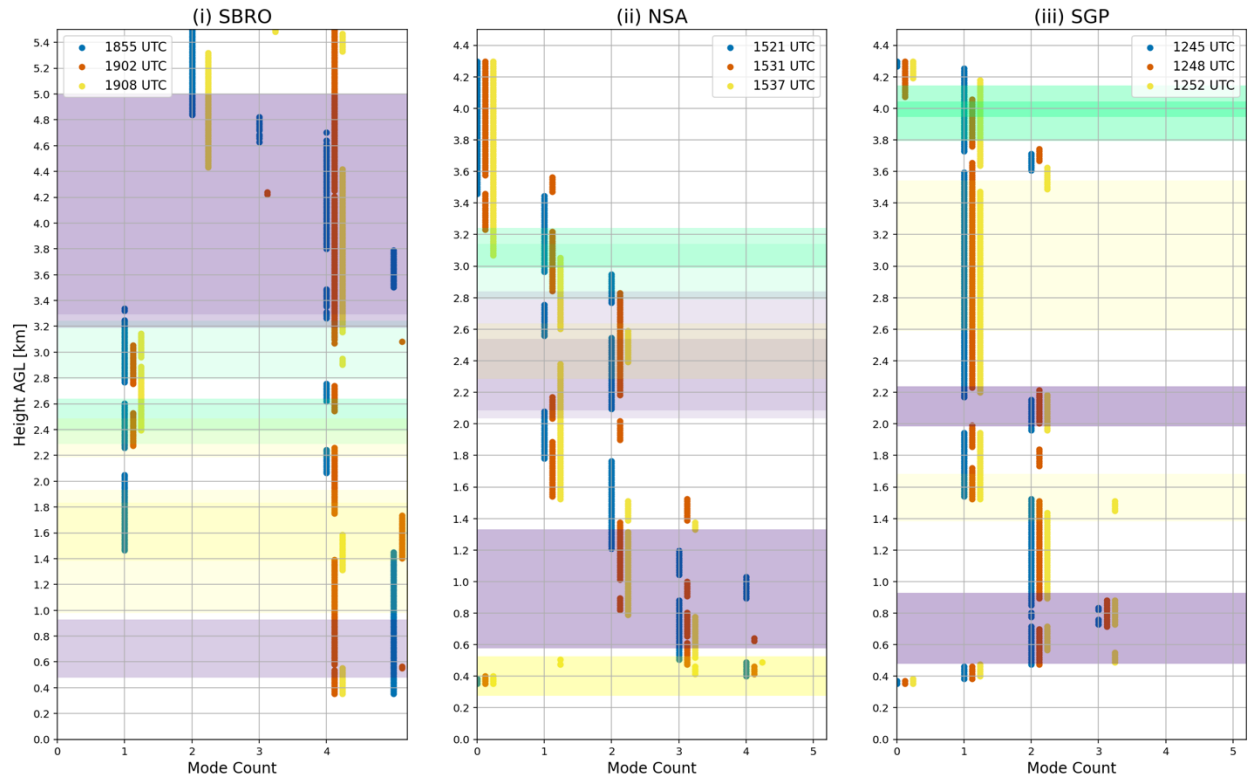

Fig. R2: This is a modification of Fig. R1 with the adjusted layer shading overlaid to indicate how we ensured that only uni-modal layers are able to be designated “control” and only multimodal layers are able to be designated “mode” -- mode is designated with purple and control with green for this example of how the new layers line up, turbulence is indicated with yellow shading. Opacity is related to the count of times that use those heights. For example, the SGP case uses all the same layers for all 3 times and thus the layers combine to  $\alpha=0.3$ , whereas a layer used by a single height will have  $\alpha=0.1$  (a lighter, less opaque shade). These are plotted for each time individually in Figure R3 below in our revision of Figure 5.

To summarize, the main impacts from this new analysis are (1) adding a low-level “mode” layer to SBU (2) relocating the “control” layer for SBU (3) slightly shortening the SGP “mode” layer considering where the bi-modal classification ends (4) removing the “control” layer from the NSA case and carefully relocating it to the non-turbulent area around 3 km. Note that in many cases the uni-modal layer is not continuous (SBRO at 2.6-2.8 km AGL, NSA 1.9 km AGL in the 1531 scan, and others). Some of the ambiguity on the gaussian GMM detecting a uni- or multi-modal comes from (1) the role of turbulence and (2) increase in the noise floor above 30 dB (note the upper levels of NSA and SGP with 0 modes). The improved layer selections will now be represented in Figure 4 of the revision, and below in Figure R3.

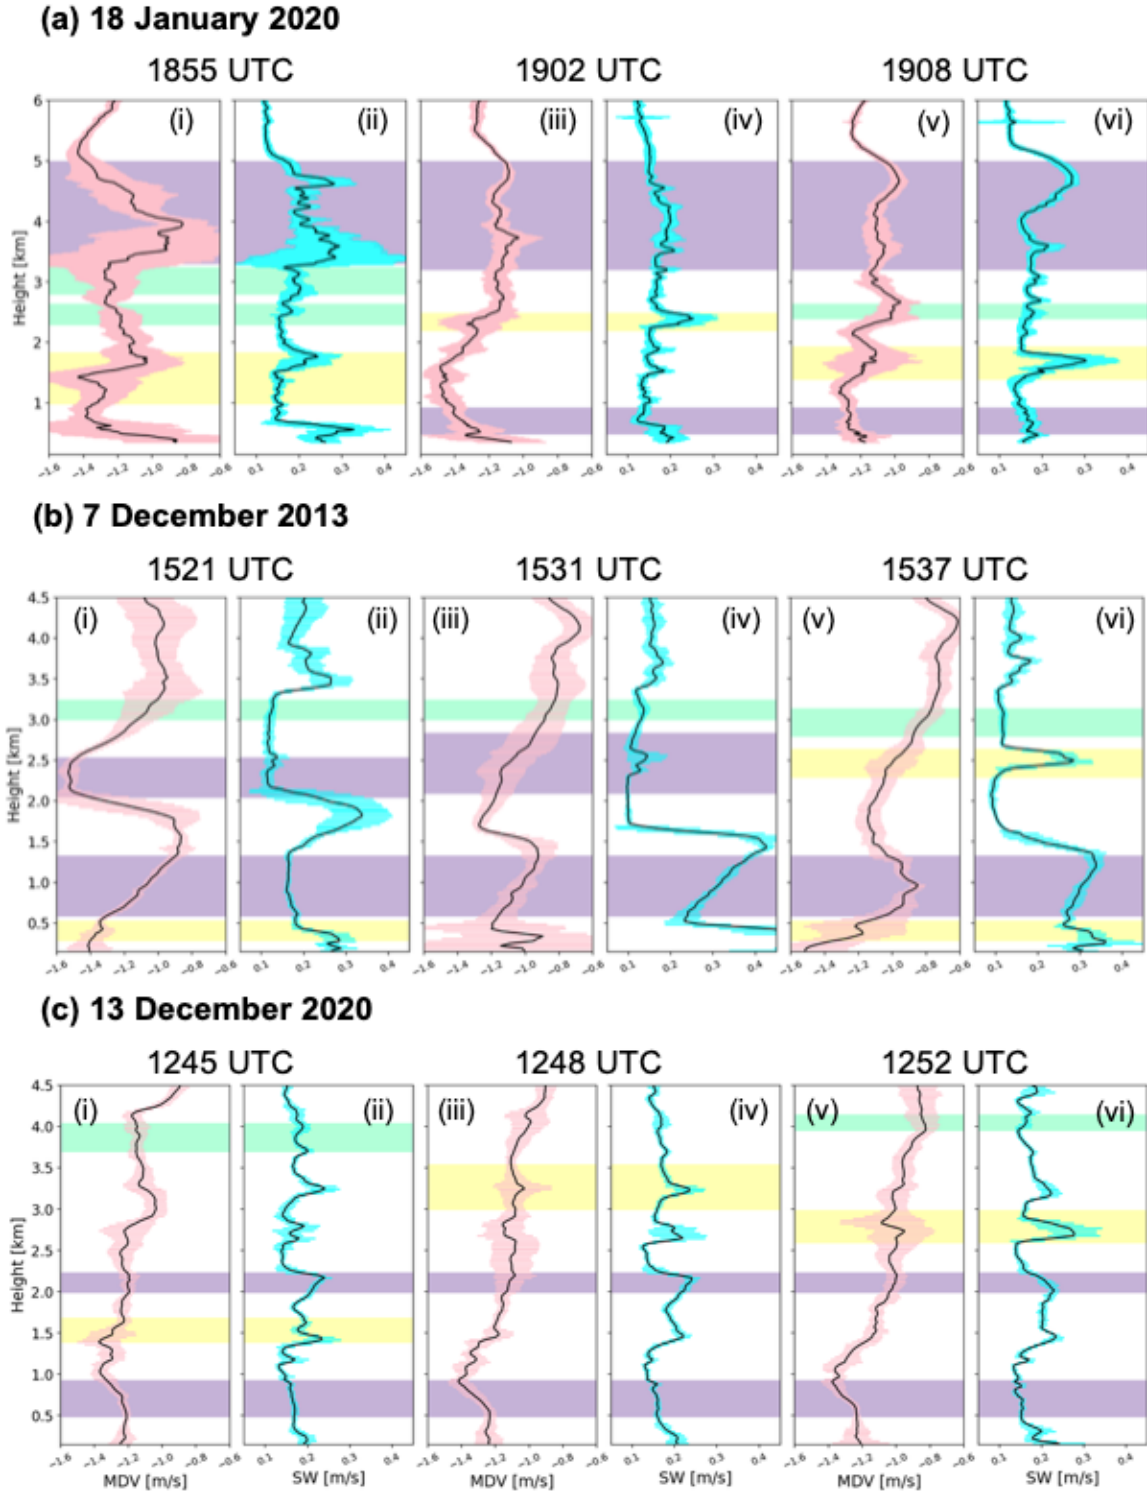

Fig. R3: Updates to the previous iteration of figure 4, with corrections and adjusted layer selections. As before the caption will read: “Radar moment MDV and SW for three times for each of the three cases: (a) SBRO at (i-ii) 1855 UTC, (iii-iv) 1902 UTC, and (v-vi) 1908 UTC;

(b) NSA at (i-ii) 1521 UTC, (iii-iv) 1531 UTC, and (v-vi) 1537 UTC; (c) SGP at (i-ii) 1245 UTC, (iii-iv) 1248 UTC, and (v-vi) 1252 UTC. Purple shading indicates multi-modal layers, yellow is turbulence, and cool green are control layers, unaffected by spectrum-broadening processes. Pink and cyan error bars along each black line is the standard deviation of each moment variable, taken in time over 145-s periods.”

Shown in Figure R3, we retain the original style of human-influenced layer selection (designated turbulent, mode, control) though this is now supplemented by the analysis of the GMM output (which in figures R1 and R2 designated uni-modal and multi-modal heights). The following figure “Fig. R4” is a replacement for former Figure 5 in the preprint. The former heat-map is removed for visual clarity and instead it now contains only the mean and error bar visualizations. This is provided for several subsets of datapoints, in Fig. R3a we show how the contributing cases fill the parameter space when examined via layer classification and via GMM mode identification. In Fig. R3b, we show the same quantities with restricted stdev(MDV) to represent the effect of the use of that parameter to exclude signals caused by turbulence.

As a result, the parameter space of mean moment SW and standard deviation moment MDV have changed. In the most recent iteration, a multi-modal layer via layer analysis has a mean SW of  $0.19 \text{ m s}^{-1}$  and a multi-modal layer via the GMM technique has a mean SW of  $0.175 \text{ m s}^{-1}$ . Examining both groups again with likely turbulent layers filtered out (corresponding to a standard deviation of MDV greater than  $0.2 \text{ m s}^{-1}$ ) multi-modal layer via layer analysis has a mean SW of  $0.19 \text{ m s}^{-1}$  and a multi-modal layer via the GMM technique has a mean SW of  $0.165 \text{ m s}^{-1}$ . While this is close to our previously indicated criterion of  $0.19 \text{ m s}^{-1}$ , we plan to re-run the results of Part 2 with an adjusted value of  $0.17 \text{ m s}^{-1}$  applied. We expect this to somewhat increase the total number of cases and case lengths, and to potentially detect cases that do not meet the previous verification criteria as outlined in both initial submissions.

Examining these added figures, it is clear that the GMM analysis is able to discern more subtle modes that do not always meet our criteria for what we considered as “distinct” with a detectable drop in reflectivity between the modes (see line 263 in the preprint of part 1: a 5 dB or larger drop in reflectivity between the modes). This new analysis has given us this additional reference point for the potential for a user to adjust their SW criterion when interested in detecting more subtle secondary and tertiary modes, and for multi-modal events that this criteria may miss.

We have modified the revised text to explain this revised approach and to make the points discussed above regarding our methods and associated with the revised figures.

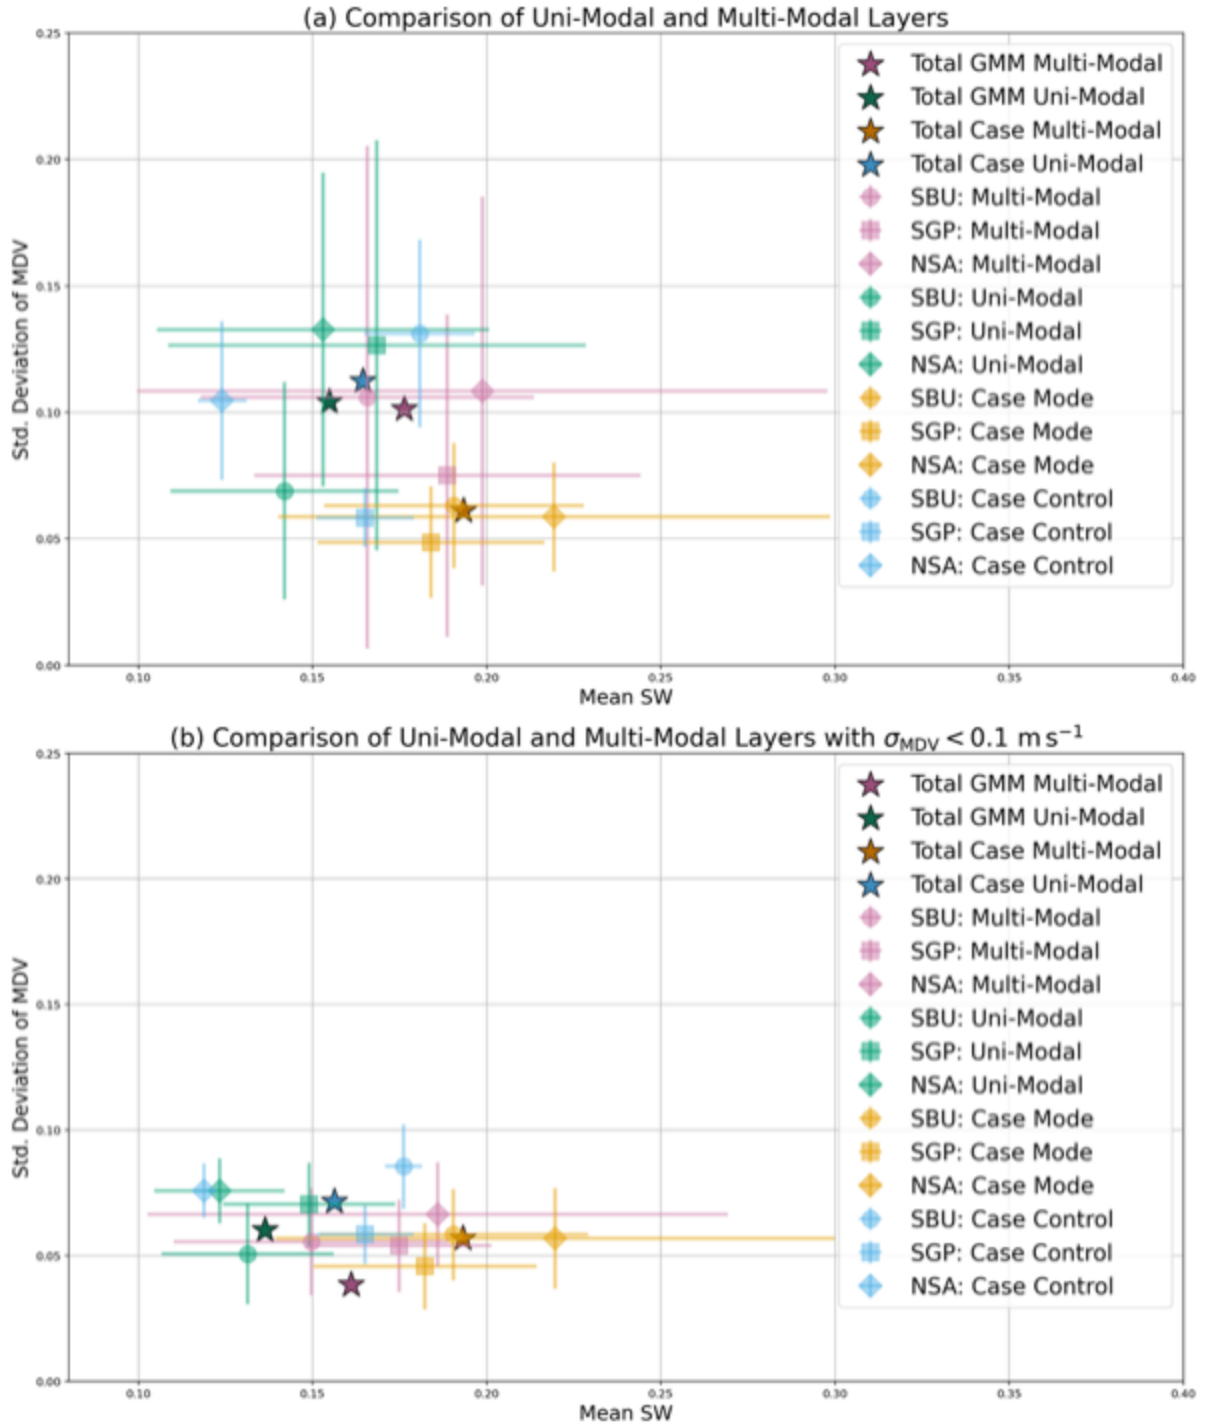

Fig. R4: (a) Comparison of uni-modal and multi-modal layers by two methods – uni- and multi-modal parameters by case plotted with error bars, with their aggregate average plotted by stars. The markers at the center of the cross-hairs represent the average  $SW$  and  $\sigma(MDV)$  for the set of points in each category. The extent of the cross-hairs in each direction represents the standard

deviation  $SW$  and  $\sigma(MDV)$  of for the set of points in each category. Similarly (b) contains the same results with values restricted to  $\text{stdev}(MDV) < 0.1 \text{ m s}^{-1}$  (our turbulence threshold).

Unshown in this comment, we also tried k-means clustering as an unbiased method to categorize and classify the regions of the parameter space, but opted for the GMM results as they have a mathematical connection to the modality, though we noticed the clustering method also suggested a distinction between categories at  $\text{mean}(SW)$  near 0.15 m/s.

Major Comment 2: What is the expected miss rate and false positive rate of the detection algorithm? From Figure 7 it seems like there is a missed multi-modal spectra as pointed out in the main text. However, because the authors only look at three cases, it's hard to actually evaluate the performance of the algorithm. The authors will need to be very careful in part 2 to objectively evaluate the algorithm's performance and to properly quantify the hits, misses, false alarms, and nulls using a larger dataset. In my opinion, this really necessitates the ability for the authors to provide a much more objective set of criteria for determining multi-modality or uni-modality.

Much of this is addressed in part 2, the preprint of which is available now at <https://doi.org/10.5194/egusphere-2025-672> (with revisions in progress as well). The original algorithm was tested on three years of data from the KAZR at the NSA site, independent of the case in this portion of the paper.

Additionally, this has now been re-run with the adjustments made to the criteria discussed in response to Major Comment #1. This includes adjusting the  $SW$  criteria that was responsible for the previous run missing the multi-modal layer at 19:02 UTC in the SBRO case (see below Figure R5 to see improvement). We were also being too cautious with including that lower segment of the multi-modal layer in the 19:02 UTC SBRO observation into the designated layer used for parameter determination (see above with the newly applied GMM approach to improve our layer identification), and that has been adjusted as well within the next version to be submitted.



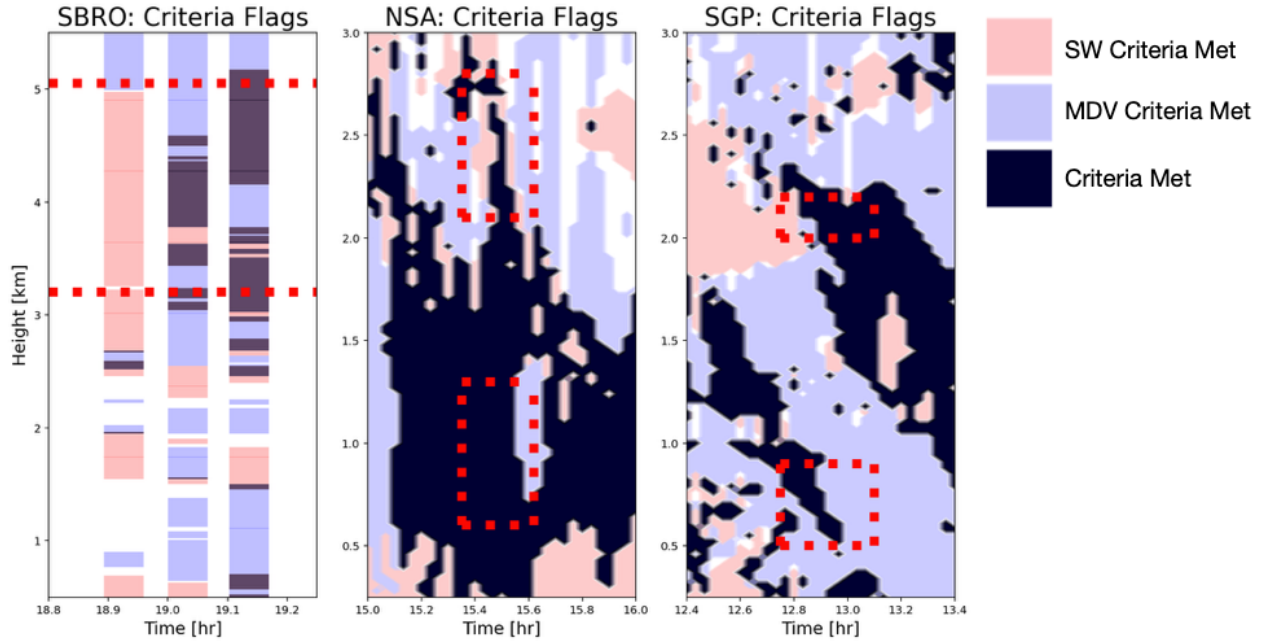

Fig. R5: Previous figure 7 edited to include modified “mode” zones and with the reduced threshold on SW. Revision caption to read: “Results of the detection algorithm applied onto the foundational cases for (a) SBU (b) NSA (c) SGP. In (a) the flags are indicated by thin horizontal lines because the VPT data is only available in the short time periods used to compute the flags. (b) and (c) are shaded and continuous in time because KAZR operates continuously in VPT mode. Pink indicates presence of only the flag with  $SW > 0.17$  m s<sup>-1</sup> and  $\sigma(MDV) > 0.1$  m/s, blue indicates presence of only the flag with  $\sigma(MDV) < 0.1$  m s<sup>-1</sup> and  $SW < 0.17$  m s<sup>-1</sup>, and black indicates all necessary criteria for a flag being met. Red dotted lines indicate the maximum bounds in time and height used to define the multi-modal layers used to obtain the criteria.”

While we referred to the GMM results for guidance, it was also interesting to note that the GMM analysis failed to identify the multi-modal layer between 1.5-2.0 km AGL in the NSA case, which is visually apparent. That layer is detected by our check of the methods on the foundational cases however (above, Fig. R5, new Figure 7). As such, we are concerned that the Gaussian mixture method is not sufficient to use as the sole source of verification.

Considering only the results of the GMM analysis to determine the uni- or multi-modality, we examined the parameter space for all points and for all points that have a  $\text{stdev}(MDV)$  below the threshold of 0.1 m/s. We examined the ratio of points that fall below and above the mean( $SW$ ) of the uni- and multi-modal subsets. With turbulence the mean value was 0.175 and without turbulence the mean value was 0.16; in both analyses approximately 43% of points in the multi-modal category exceeded this. While this would suggest a large expected missed detection, we account for the margin of error in the implementation of the criteria by examining the cases by hour and by height. Existence of a predicted multi-modal case is dependent on (1) large flag counts (2) clustering of the flags within a layer or fall streak and



quantified considering (3) a percentile approach to identify the predicted top and bottom of the layers.

When designing the algorithm, we were tolerant of missed detections (particularly some of those more subtle ones highlighted by the GMM analysis above) in favor of more robust features. For example, in the 1521 NSA case, there is a low reflectivity (-20 dBZ), detached, secondary mode located at 2.5 km AGL that GMM detected but was not robust enough to affect moment SW. Rather, we expect (and have seen within results for part 2) that the technique is more suited for identifying multi-modal cases with somewhat greater reflectivity coming from both modes (as in those seen in this paper at lower levels within the NSA case and those modes near 2 km AGL in the SGP case). Inherently the moment SW is linked to the contributing power (reflectivity), causing the detectable increase in SW used in the criteria. Having a large number of false positives, in our view, would make the searching more time consuming and inefficient. We address this philosophical choice in the revised manuscript, and suggest that readers interested in detecting a higher percentage of all multi-modal features can adjust the parameters accordingly.

Accordingly, with the edits made to the methodology within Part 1 that improve the parameter choices for layer detection, much of this comment is addressed in the edits to Part 2.

---

### Minor Comments:

Minor Comment 1: The authors state in the conclusions that: “The design of the criteria and methodology is targeted at reducing false positives; it is likely that the use of these criteria may miss the detection of some multi-modal spectra (cf. Fig. 7).” This seems backwards to me. If anything, wouldn’t you want to reduce missed events? The reasoning is that you can always revisit the spectra data for flagged periods to verify multi-modality after the fact. Therefore, false positives, unless there are many, aren’t that big of a deal whereas missed multi-modal spectrums represent a serious deficiency in your algorithm as possibly suggested by Figure 7.

Interesting question -- we suppose it comes down to a matter of philosophy. When designing the algorithm, we were tolerant of missed detections (particularly those more subtle ones highlighted by the GMM analysis above) in favor of more robust features. Having a large number of false positives, in our view, would make the search more time-consuming. We can address this philosophical choice in the revised manuscript and suggest that readers interested in detecting a higher percentage of all multi-modal features can adjust the parameters accordingly. We expect that many of the points that would be missed may be adjacent to previously detected layers and may affect results such as layer depth as discussed in part 2.

Ultimately, a balance of the tolerance for the missed events with tolerance for false positives would be interesting, but the amount of data required to test the missed events makes this prohibitively time consuming and computationally expensive. In our ongoing revisions to part 2, we will be including a subset that was tested for missed events, however with the extreme computational cost of processing the full three year period at the resolution required, it would be prohibitively expensive computationally and in time for the entire verification analysis.

Minor Comment 2: I was disappointed to see a lack of complimentary data from other instruments present at these three sites. The SBU site in particular has a wealth of potentially useful ground instruments like Pluvio, Parsivel, and the MASC imager. These instruments could be helpful in part 1 of this paper to provide some hints to readers as to the actual mechanisms behind periods of multi-modal spectra. I don't necessarily think that the authors have to include such data in their analysis (perhaps that will be in part 2?). However, I do think that the authors should at least consider including one or two figures that use these additional instruments to help provide context into the potential sources of the multi-modality for each of the cases. That is, do MASC images of the particles at the ground support hypotheses of rime splintering, ice-ice collisions, or freezing drop fragmentation near regimes of multi-modal Doppler spectra?

We agree that the complementary data are very valuable in parsing out the details and trying to identify possible active processes. In part 2, following the long-term analysis we then follow that with a detailed look into three detected of the cases. Those cases, all observed at the ARM NSA site, are analyzed in more depth to discuss the possible processes and features being detected by the algorithm. Additionally with all verification cases occurring at the same site, they should have the same available instrumentation (depending on instrument down time and maintenance). Part 2 received similar feedback; as such, we incorporate and will strengthen these types of complementary observations that were available on the dates used in part 2.

Specifically addressing the NSA case: Oue et al. 2015 does address this case in a much more comprehensive manner already, including both the Ka-band KAZR and X-band XSAPR and Microwave Radiometer (MWR). That previous analysis indicated multiple embedded liquid layers within the cloud depth, though cuts off at approximately our analysis time. Below in figure RX, we plot the liquid water path and total water vapor during the periods shown. During the analysis period, as with in Oue et al. 2015, the NSA case has LWP of approximately 200 g/m<sup>2</sup>, indicating the liquid layers identified in the previous study still exist within this period. The SGP case has much greater values of both LWP and total water vapor detected by the MWR, suggesting the role of liquid water in cloud processes and potentially (but unconfirmed) liquid cloud droplets comprising identified modes.

The SBRO case was a part of the IMPACTS field campaign; while unshown in this paper the P-3 research aircraft did observe liquid cloud droplets at approximately 5 km AGL near the analysis within this time over Long Island, though not flown close enough to directly over KASPR and hence unshown. We did a dual-wavelength ratio analysis of the SBRO case using W-band observations from ROGER which suggested aggregation as a dominant process throughout the times shown and depth of the observations. While MASC images are not a part of the available IMPACTS dataset, the Parsivel disdrometer and Doppler lidar were observing during this event. Per the disdrometer, moderate snowfall was either intermittent or continuous across the period. Particles ranging in size from (on average) 0.25-2 mm were observed falling at 0.5-2.5 m/s, peaking at 0.6 mm and 1 m/s across the analyzed time. With some smaller, 0.5 mm particles observed at faster speeds near 2 m/s, it is possible that riming could have occurred aloft causing small observed particles to have a large enough mass to result in fast fall speeds (but not conclusive enough to state within our analysis). Lidar indicates likely liquid water near the surface (below 300 m AGL) that could contribute to riming, but does not have signal aloft to determine if higher liquid layers exist.

This commentary about observations of liquid in the foundational cases will be added to the text of section 3.2 Doppler Spectral Signatures and indicate if liquid layers may be present in those cases, contributing to plausible explanations for modes being observed.

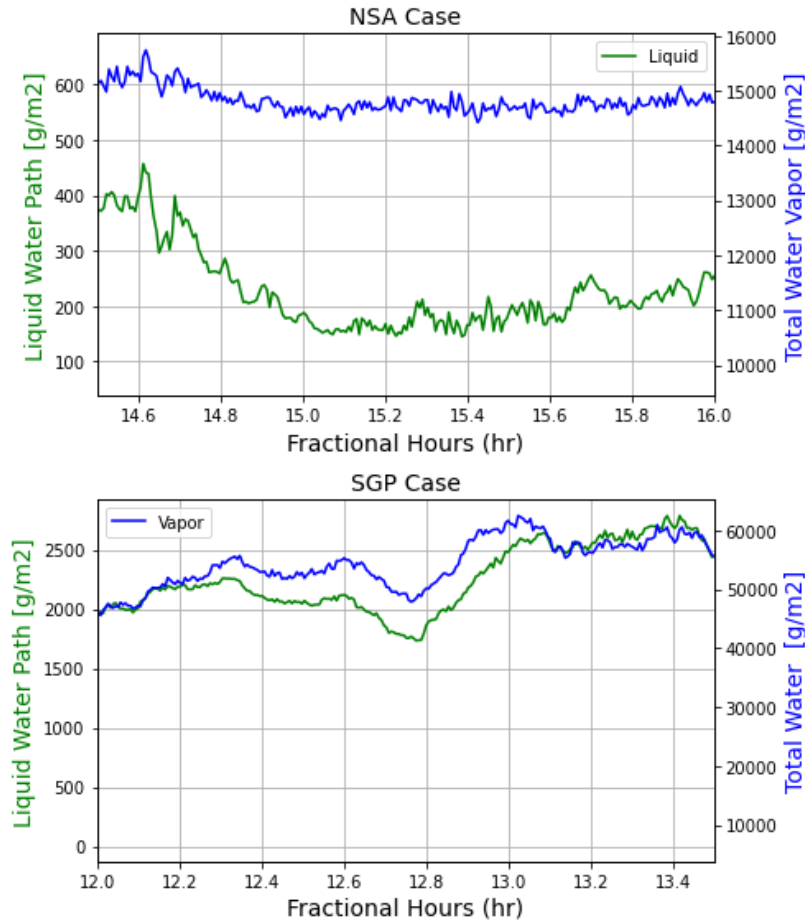

Figure R5: A look into the liquid water and water vapor contents of the two cases located at DOE-ARM sites with a microwave radiometer (MWR) that measures both the liquid water and water vapor along the line of sight path. Both cases have signals indicative of the presence of liquid water within the system that may contribute to either multi-modal signals or cloud and precipitation processes.
