# Supplementary material for: Detection of Multi-Modal Doppler Spectra. Part 1: Establishing Characteristic Signals in Radar Moment Data
Source: Copernicus journal article supplement (doi:10.5194/egusphere-2025-671), 2025-02-25
Supplement: Supplementary file [file egusphere-2025-671-AC2-supplement.pdf]

Reviewer #2:

## Major Comments:

Major Comment 1: In my opinion the detection of a second mode and turbulence is too subjective. You are likely missing a lot of cases due to your rather arbitrary requirement of a 5dB reduction of spectral Ze and a minimum spectral Ze of -20dB for a multi-modality. Especially because your entire technique is based on those few subjective cases. Also, I am not sure if the number of cases you used to establish the MDV and SW thresholds are sufficient. It could very well be that these few cases are special, especially since you had such subjective selection criteria. To my knowledge, there are a few Doppler spectra peak detection algorithms openly available. For example, I have recently used the peako-peaktree toolset (<https://amt.copernicus.org/articles/17/6547/2024/>) and found it to be easily applicable to Doppler spectra of several different radars. In my opinion, detecting peaks in such an automatic, objective way would greatly benefit your study, especially since then you can use much more data to make your MDV, SW clustering and threshold definition more robust. Similar algorithms are available for turbulence detection, for example eddy dissipation rate retrievals. I would suggest to first apply a peak detection algorithm, filter for cases where multiple peaks were obtained (also perhaps where the feature is consistent enough to be caused by microphysics) and then do the clustering in  $\sigma(\text{MDV})$  mean(SW) space. If you apply a peak detection algorithm, also your validation of the study is much easier, as you do not need to manually go through a lot of cases in order to visually see if your algorithm is valid. This is also why I think you do not need 2 papers to describe the method. Using a peak detection algorithm already reduces this study to the clustering in  $\sigma(\text{MDV})$  mean(SW) space, allowing you to cover the validation of the method in the same paper.

Thanks for this feedback, this also came up as a similar suggestion from Reviewer 1 to consider a Gaussian Mixture model approach to doing this (abbreviated GMM going forward). I initially pursued setting up the peako-peaktree toolset as you recommended; however, within the documentation and tutorial scripts provided it was stated that processing one hour of data could exceed 30 minutes, which, while feasible for the initial cases in Part 1, becomes quite computationally expensive if scaled up to a long-term dataset or used for a three-year verification project.

Ultimately, we have followed the previous recommendation for the GMM approach and now utilize a Bayesian Gaussian Mixture model to detect the number of peaks at every height in the original three cases at the nine specified times. This is done to temporally averaged spectra over approximately 12 seconds [with the varied temporal resolution of KAZR and KASPR, this is more precisely 11.08 s (3 time steps) for both cases using KAZR and 12.39 s (12 time steps) for KASPR]. This averaging reduces the superfluous peaks detected by the automatic peak detection function and noise generated by rapidly switching between 2, 3, or greater peaks when observed the detected peak count with respect to height.

We now use the results of this to inform layer selection of “control” and “mode” layers, and those previously selected layers are now adjusted in the revision to confirm their uni-modal or multi-modal status before assigning them to either a control or mode category. Taking the SBRO case for example, the previous analysis was indeed missing a subtle multi-modal layer

that overlaps with the previous “control” layer for that case. While this lower multi-modal layer is much less distinct, it is detectable through spectral analysis. An additional multi-modal layer is added to the analysis and the “control” layer is now represented elsewhere, when a uni-modal layer unaffected by turbulence can be identified. Additionally, the depth of the upper level multi-modal layer is now extended. For the NSA case, the control layers are minorly affected and shortened to accommodate the limited uni-modal depth identified with GMM. For the SGP case, we were missing a low-level multi-modal layer that is now reclassified and the uni-modal control layers were relocated to near the top of the cloud.

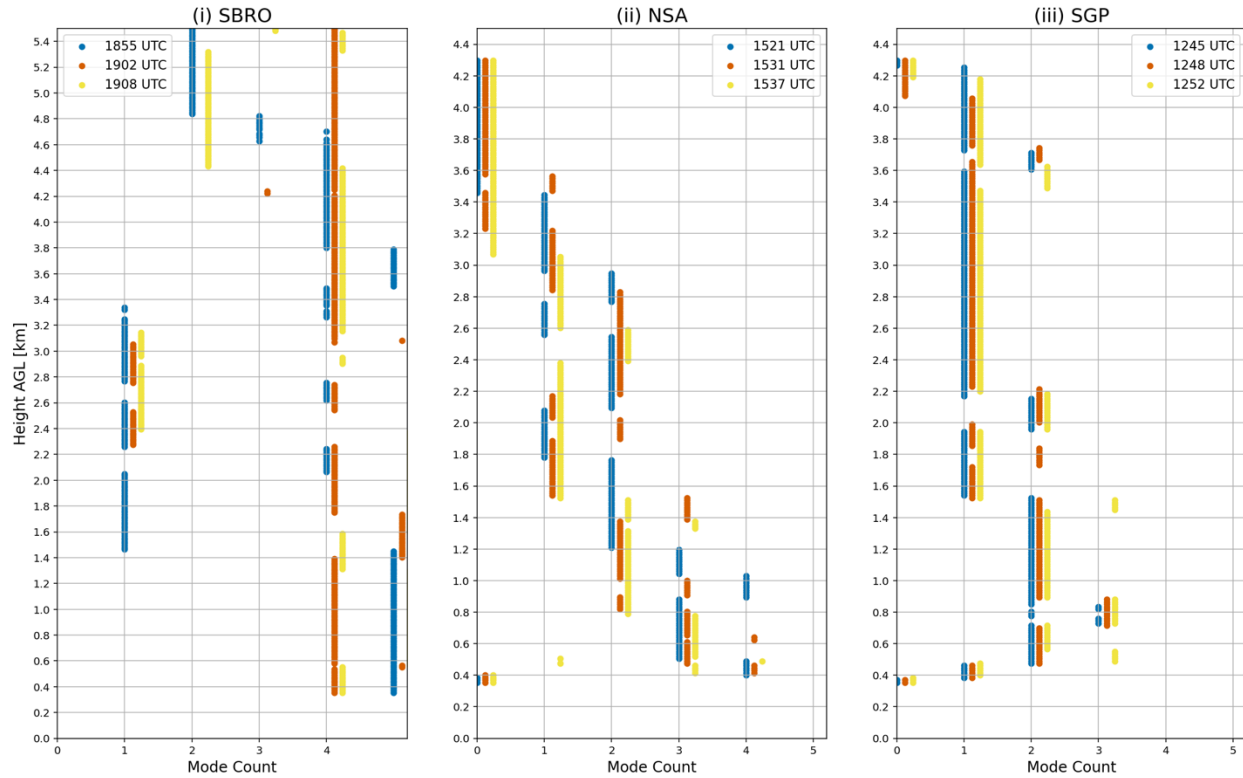

Fig. R1: Bayesian GMM fit mode count for the foundational cases. Plotted is the average mode count over a 300-m window in height to reduce noise.

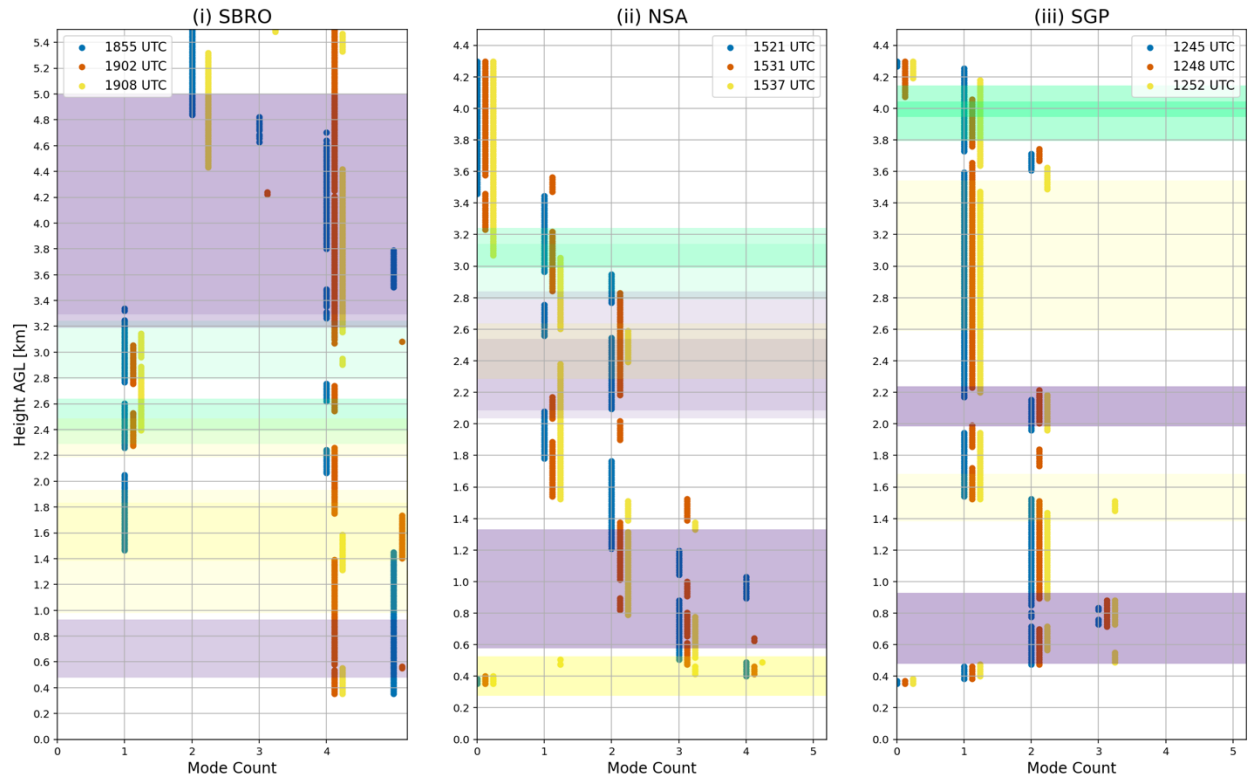

Fig. R2: This is a modification of Fig. R1 with the adjusted layer shading overlaid to indicate how we ensured that only uni-modal layers are able to be designated “control” and only multimodal layers are able to be designated “mode” -- mode is designated with purple and control with green for this example of how the new layers line up, turbulence is indicated with yellow shading. Opacity is related to the count of times that use those heights. For example, the SGP case uses all the same layers for all 3 times and thus the layers combine to  $\alpha=0.3$ , whereas a layer used by a single height will have  $\alpha=0.1$  (a lighter, less opaque shade). These are plotted for each time individually in Figure R3 below in our revision of Figure 5.

To summarize, the main impacts from this new analysis are (1) adding a low-level “mode” layer to SBU (2) relocating the “control” layer for SBU (3) slightly shortening the SGP “mode” layer considering where the bi-modal classification ends (4) removing the “control” layer from the NSA case and carefully relocating it to the non-turbulent area around 3 km. Note that in many cases the detected uni-modal layer is not continuous (SBRO at 2.6-2.8 km AGL, NSA 1.9 km AGL in the 1531 scan, and others). Some of the ambiguity on the gaussian GMM detecting a uni- or multi-modal comes from (1) the role of turbulence and (2) increase in the noise floor above 30 dB (note the upper levels of NSA and SGP with 0 modes). The improved layer selections will now be represented in Figure 4 of the revision, and below in Figure R3.

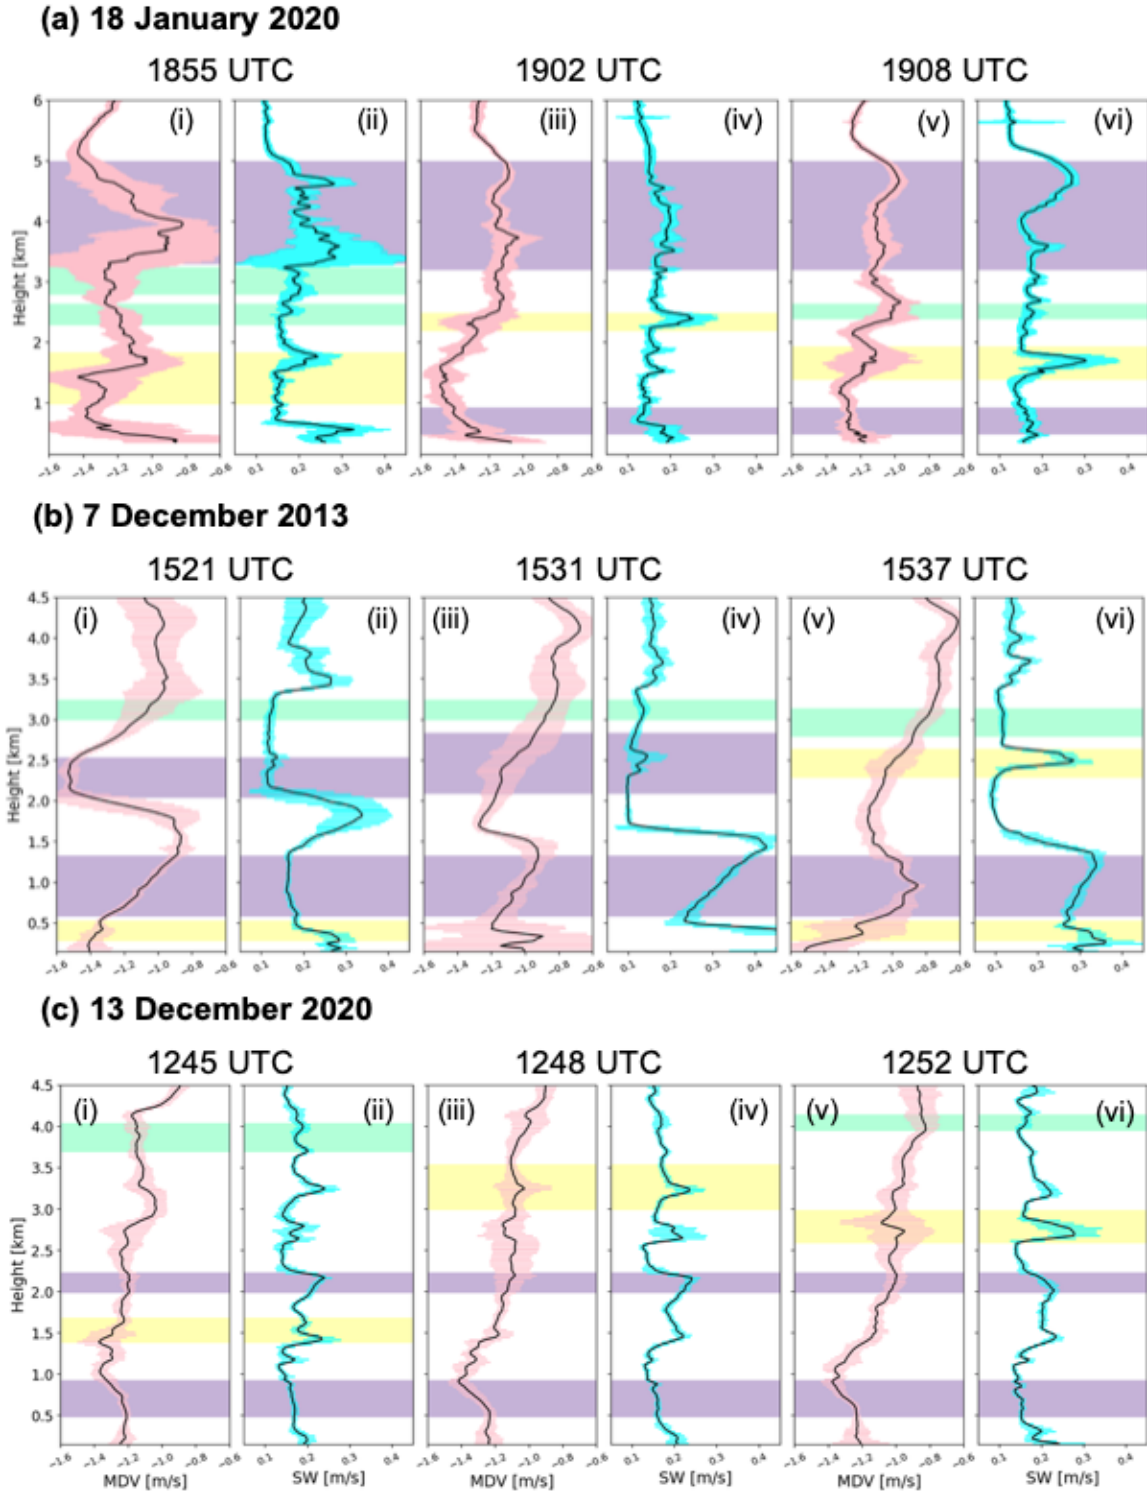

Fig. R3: Updates to the previous iteration of figure 4, with corrections and adjusted layer selections. As before the caption will read: “Radar moment MDV and SW for three times for each of the three cases: (a) SBRO at (i-ii) 1855 UTC, (iii-iv) 1902 UTC, and (v-vi) 1908 UTC;

(b) NSA at (i-ii) 1521 UTC, (iii-iv) 1531 UTC, and (v-vi) 1537 UTC; (c) SGP at (i-ii) 1245 UTC, (iii-iv) 1248 285 UTC, and (v-vi) 1252 UTC. Purple shading indicates multi-modal layers, yellow is turbulence, and cool green are control layers, unaffected by spectrum-broadening processes. Pink and cyan error bars along each black line is the standard deviation of each moment variable, taken in time over 145-s periods. “

Shown in Figure R3, we retain the original style of human-influenced layer selection (designated turbulent, mode, control) though this is now supplemented by the analysis of the GMM output (which in figures R1 and R2 designated uni-modal and multi-modal heights). The following figure “Fig. R4” is a replacement for former Figure 5 in the preprint. The former heat-map is removed for visual clarity and instead it now contains only the mean and error bar visualizations. This is provided for several subsets of datapoints, in Fig. R3a we show how the contributing cases fill the parameter space when examined via layer classification and via GMM mode identification. In Fig. R3b, we show the same quantities with restricted stdev(MDV) to represent the effect of the use of that parameter to exclude signals caused by turbulence.

As a result, the parameter space of mean moment SW and standard deviation moment MDV have changed. Notably with our increased tolerance for less distinct secondary modes in the parameter identification, there is a greater spread in the possible mean(SW) values, but generally similar values for the uni-modal (control) layer. In the most recent iteration, a multi-modal layer via layer analysis has a mean SW of  $0.19 \text{ m s}^{-1}$  and a multi-modal layer via the GMM technique has a mean SW of  $0.175 \text{ m s}^{-1}$ . Examining both groups again with likely turbulent layers filtered out (corresponding to a standard deviation of MDV greater than  $0.2 \text{ m s}^{-1}$ ) multi-modal layer via layer analysis has a mean SW of  $0.19 \text{ m s}^{-1}$  and a multi-modal layer via the GMM technique has a mean SW of  $0.165 \text{ m s}^{-1}$ . While this is close to our previously indicated criterion of  $0.19 \text{ m s}^{-1}$ , we plan to re-run the results of Part 2 with an adjusted value of  $0.17 \text{ m s}^{-1}$  applied. We expect this to somewhat increase the total number of cases and case lengths, and to potentially detect cases that do not meet the previous verification criteria as outlined in both initial submissions.

Examining these added figures, it is clear that the GMM analysis is able to discern more subtle modes that do not always meet our criteria for what we considered as “distinct” with a detectable drop in reflectivity between the modes (see line 263 in the preprint of part 1: a 5 dB or larger drop in reflectivity between the modes). This new analysis has given us this additional reference point for the potential for a user to adjust their SW criterion when interested in detecting more subtle secondary and tertiary modes, and for multi-modal events that this criteria may miss.

We have modified the revised text to explain this revised approach and to make the points discussed above regarding our methods and associated with the revised figures.

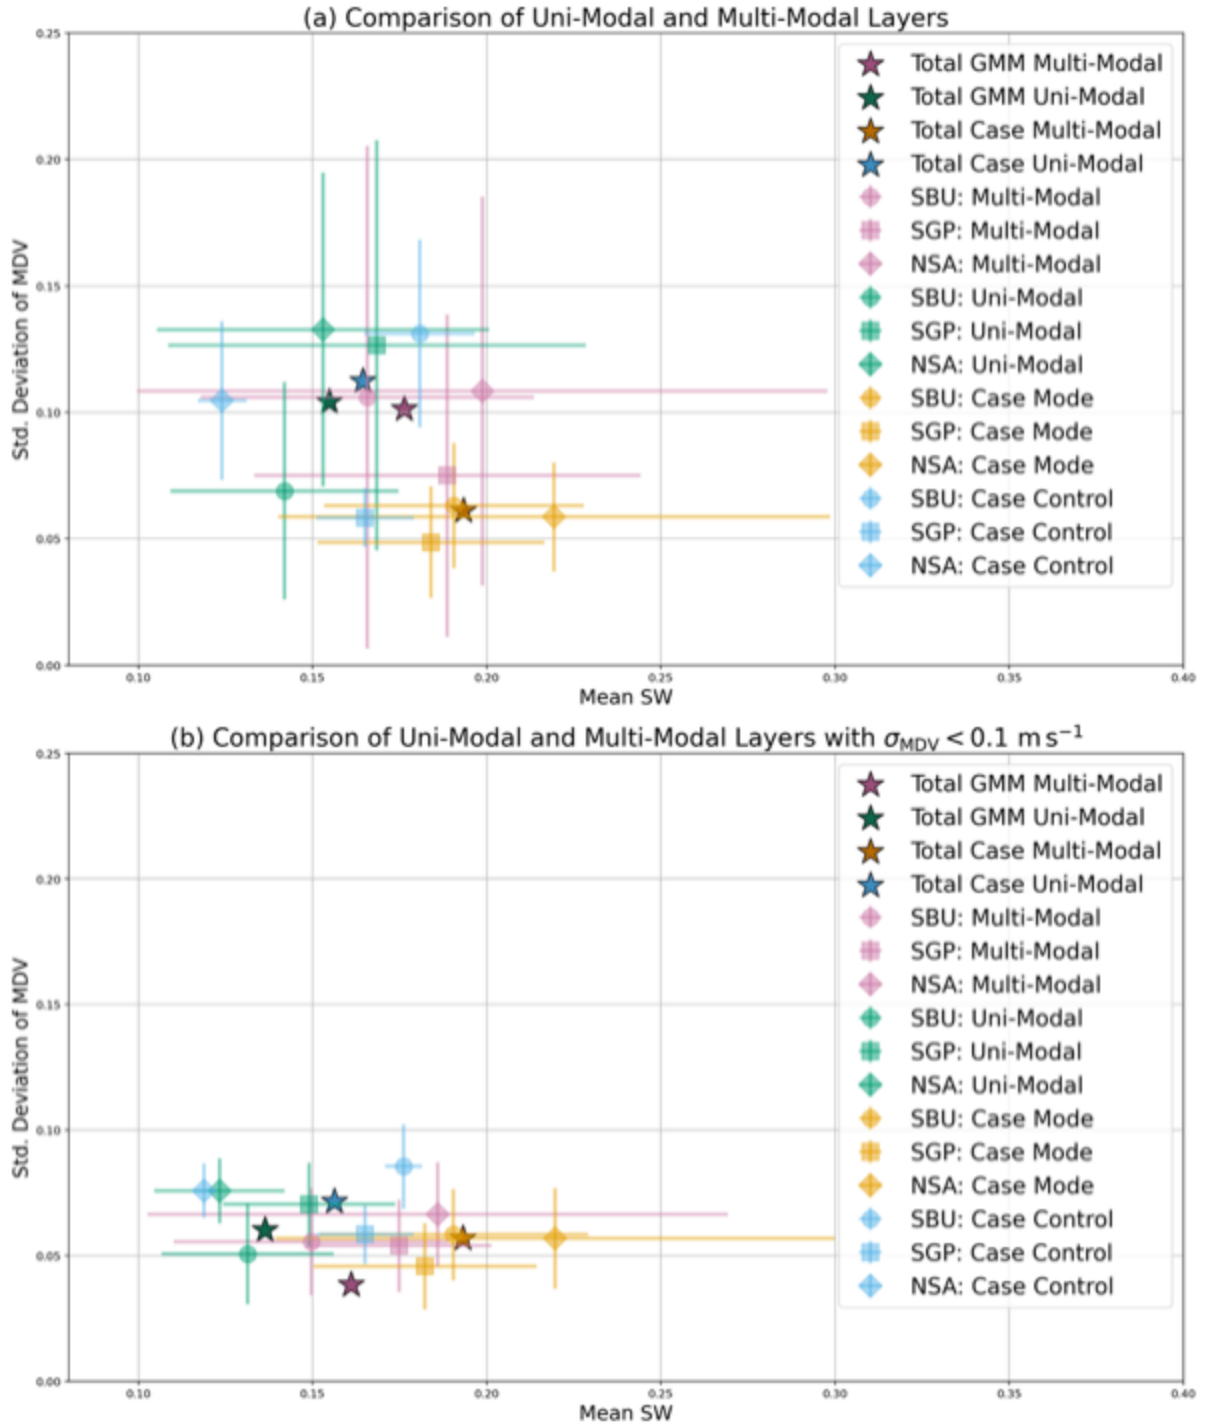

Fig. R4: (a) Comparison of uni-modal and multi-modal layers by two methods – uni- and multi-modal parameters by case plotted with error bars, with their aggregate average plotted by stars. The markers at the center of the cross-hairs represent the average  $SW$  and  $\sigma(MDV)$  for the set of points in each category. The extent of the cross-hairs in each direction represents the standard

deviation  $SW$  and  $\sigma(MDV)$  of for the set of points in each category. Similarly (b) contains the same results with values restricted to  $\text{stdev}(MDV) < 0.1 \text{ m s}^{-1}$  (our turbulence threshold).

Unshown in this comment, we also tried k-means clustering as an unbiased method to categorize and classify the regions of the parameter space, but opted for the GMM results as they have a mathematical connection to the modality, though we noticed the clustering method also suggested a distinction between categories at  $\text{mean}(SW)$  near 0.15 m/s.

Regarding the classification of turbulent layers: if you have a particular method for detecting those in data from vertically pointing radars, we would love incorporate it. For the time being, we are improving our justification for the identification of turbulence through the use of the standard deviation of MDV.

Turbulence, the irregular fluctuations in the motion of air, is observed in all three velocity components and these fluctuations can then lead to an increased value in the standard deviation of MDV, greater than in non-turbulent layers (AMS Glossary). Increases in the variability of MDV will translate to a larger standard deviation of MDV. MDV is essentially a sum of the contributing velocities associated with motions (e.g. uniform wind, shear, turbulence) and the spectrum width quantifies the spread produced by the sum of those processes (Doviak and Zrnica 1993). Turbulence within a cloud or cloud layer will increase the variability of MDV and localized updrafts and downdrafts may be observed, also broadening the total spectrum width (Borquez et al. 2016). The effect of turbulence at a short time scale (i.e. the 3.7 s integration time or 145 s temporal average) is to increase SW and cause rapid oscillations in MDV. When the 145 s period is averaged, those rapid oscillations can result in a maxima of standard deviation of MDV. More uniform processes (occurring consistent across a two-minute period or consistent within the cloud) do not affect the standard deviation as strongly.

We retain the manual classification of turbulent layers for the layer analysis, but now also incorporate a more objective turbulence “cut-off” and examine the GMM-detected multi/uni-modal layer parameter space before and after removing turbulent heights from consideration (see Figure R4). This helps to distinguish the features of multi-modal signals from turbulent signals.

Although the reviewer states that, if we run this algorithm, we would "not need to manually go through a lot of cases in order to visually see if your algorithm is valid." We respectfully disagree and believe that validation is essential to building confidence in the algorithm – in other words, we do not feel comfortable fully relying on the GMM detections as "truth" here. In our ongoing revisions to part 2, we will be including a subset that was tested against the GMM mode detection, however with the extreme computational cost of processing the full three year period at the resolution required, it would be prohibitively expensive computationally and in time for the entire verification analysis.

---

## Minor Comments

Minor Comment 1: (line 82) you are saying that in order to identify microphysical processes in the radar you require additional information such as in-situ obs, or other radar obs. However, neither a radar or in-situ will ever be able to observe processes. The only thing we can observe



with a radar is the effect a process has on several aspects of the observed particle distribution. Maybe rephrase that sentence to make it a less strong statement

Good point! This has been rephrased: “However, attempts at identification of potentially active processes requires additional information, including polarimetry, temperature profiles, and/or in situ data to understand if there are favorable conditions or necessary ingredients for processes (e.g., riming or rime splintering).” The intent of the sentence was to indicate, as you stated, that we can only observe the effects of processes occurring and that radar alone is insufficient to make a claim.

Minor Comment 2: (Introduction) I am missing a paragraph about peak detection algorithms, since you are trying map your number of peaks (single or multi-modal) to radar moments, in my opinion it is important to mention and discuss those peak detection algorithms

A paragraph is now added to our revised paper, detailing the Gaussian mixture approach as described above in response to Major Comment 1 and the separate response to Reviewer 1 Major Comment 1. We also cite alternative tools like peako/peaktree given the reference you provided.

**Minor Comment 1: (Table 1) you are specifying that you are only averaging the KASPR data over 1 second. However, in my experience to reduce noise in the spectra it is necessary to average over at least 3 seconds, better close to 4 seconds. Can you comment on the integration time used?**

Apologies for our lack of clarity here --- when we apply the criteria (set forth in Part 1) to the moment data, we are using ~145-s averaged data, in which much of the noise is smoothed. The numbers you cite from Table 1: this is actually the integration time used to obtain a single spectra “time” and come from the team at Stony Brook and pertains to the temporal resolution of the original observations. Presently the spectra are only used at their native temporal integration in plotting (Figure 1 and Figure 2). When it comes to their use, you are quite correct. When we are processing the spectra with the newly added peak detection, the 1-s (and even 3.7-s) data are noisy and require smoothing. This is expanded on in detail in the pending revision, but, ultimately, we now average 11-12 s of spectra to determine the GMM-computed count of modes.

Minor Comment 3: (Figure 2) in the title you are using SBU for stony brook university, however, in the text you refer to it as SBRO, perhaps it would be good to change that to be consistent

Thank you for pointing this out, this title has now changed for consistency to say SBRO.

Minor Comment 4: (Figure 3) the time display is a bit confusing (i.e. 18.8 as time [UTC] perhaps it would be better to go to HH:MM format)

We agree that this is a confusing way to indicate time, this has been changed to HH:MM format in the revised figure.

Minor Comment 5: (Line 244) how do you know that  $SW > 0.2\text{m/s}$  is enhanced?



This sentence has been rewritten for clarity. We are referring to the regions of SW that are greater than the background SW that are visualized after this section, and then later quantified. The sentence now reads: “Given that both the multi-modal spectra and these turbulent layers feature *wider spectra spanning a broad range of velocity bins*, we seek additional information from the integrated moments to help distinguish between these two types of layers.”

**Minor Comment 6: (Line 297) you say you are using 499 data points. How many uncorrelated layers of turbulence and multi-modalities are these?**

The count of data points refers to the breakdown in Table 2; displaying the count of data points from the contributing cases as indicated in the highlighted layers visualized in Figure 4. The contributing layers and thus total contributing data points has changed with the updates to our methodologies for obtaining the designated layers from the foundational cases. The times used for each case are separated such that they do not share contributing points, but do share the same clouds and precipitation systems active within the times used. Data from SBRO are independent from the other sites, and in turn NSA and SGP are as well. To address the more manual manner in which layers were selected for closer analysis and parameter values, we also now include that analysis for the entire depths of the cases via GMM (see Figure R3)

**Minor Comment 7: (Line 338) you are saying you are restricting your cases to MDV<−2m/s. From your Figure 6 I am taking that you have LDR available correct? Perhaps it would be beneficial to first do a melting layer detection using LDR (LDR strongly increases at the edge of the ML, allowing a detection of the ML), and then afterwards apply your multi-modality detection algorithm to all data above the ML. Then you would also be able to use the algorithm on cases with graupel**

Thanks for this comment, this is a good way to increase the usability of this method. An additional parameter within the function for processing radar moment data has been added such that when LDR is available (as for ARM KAZR radars) that method will be used for moment processing to identify potential multi-modal layers. We will retain the discussion of the use of MDV for this in the case that someone would wish to apply this method without the availability of LDR.

For the purposes of this study, we will adopt the LDR criteria. See Figure R5 for an example of this new threshold. We evaluated some known rain events from the verification study, shown is 17 August 2023, and confirmed a reasonable value of the slope of LDR. Note that because we examine 145 s periods for this study, we determined our LDR slope threshold using the averaged data. The effects of this comment are more prominently clear in the revisions to the manuscript for part 2.

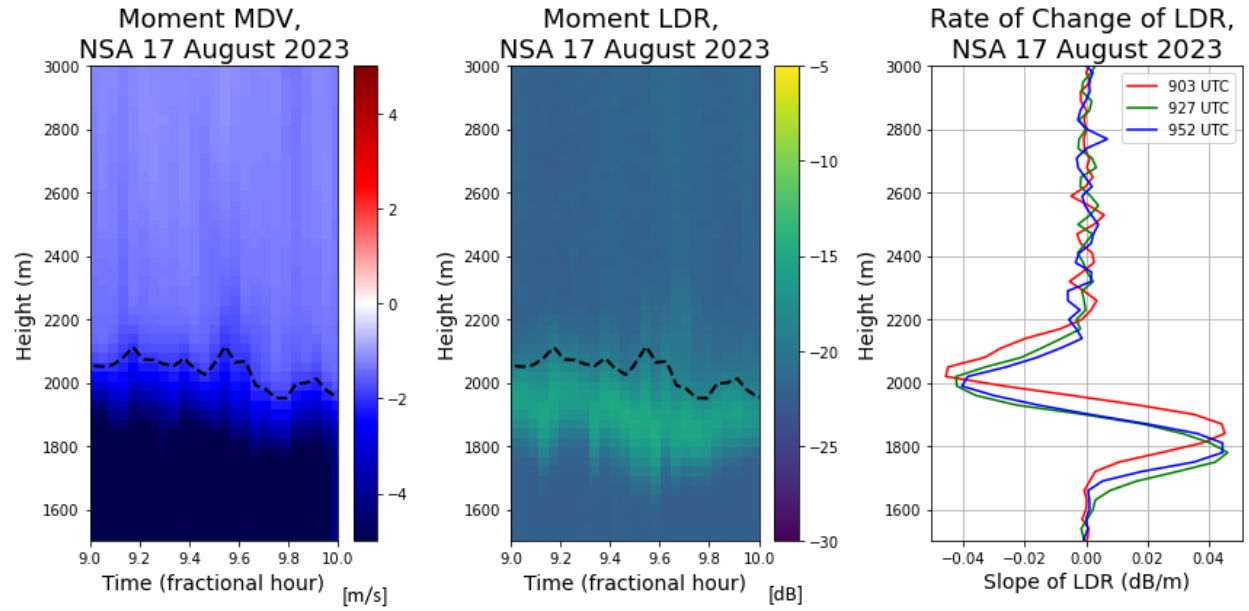

Figure R5: KAZR data from 17 August 2023, in which the MDV rain filter previously was activated at  $\text{MDV} > 2 \text{ ms}^{-1}$ , indicated by the dashed black line. Panel (a) shows mean Doppler velocity, panel (b) shows LDR, panel (c) shows the rate of change of LDR at three selected times during the hour.
